# Supplementary material for: Development and characterization of a polarized human endometrial cell epithelia in an air–liquid interface state
Source: PubMed Central journal article supplement (PMC6085666; doi:10.1186/s13287-018-0962-6), 2018-08-09
Supplement: 13287_2018_962_MOESM2_ESM.pdf [file 13287_2018_962_MOESM2_ESM.pdf]

**Table S1. Antibodies used for immunostaining in this report**

| Protein target | Full name of antibody                    | Manufacturer, catalog #    | Species raised in; monoclonal or polyclonal | Dilution |
|----------------|------------------------------------------|----------------------------|---------------------------------------------|----------|
| SSEA-1         | Stage-specific Embryonic Antigen-1       | R&D Systems, MAB2155       | Mouse; Monoclonal                           | 1 to 200 |
| Nanog          |                                          | Abcam, ab80892             | Rabbit; Polyclonal                          | 1 to 200 |
| PCNA           | Proliferating Cell Nuclear Antigen       | Millipore, MABE288         | Mouse; Monoclonal                           | 1 to 200 |
| p63            | Transformation-related Protein 63        | Thermo Scientific, MS-1084 | Mouse; Monoclonal                           | 1 to 200 |
| <b>OCT-3/4</b> | octamer-binding transcription factor 3/4 | R&D Systems, MAB1759       | Monoclonal; Rat                             | 1 to 200 |
| Ki67           | Antigen KI-67                            | Thermo Scientific, RB-9043 | Rabbit; Polyclonal                          | 1 to 200 |
| SOX2           | SRY (sex determining region Y)-box 2     | R&D Systems, MAB2018       | Mouse; Monoclonal                           | 1 to 200 |
| CD117          | proto-oncogene c-Kit                     | DAKO, A4502                | Rabbit; Polyclonal                          | 1 to 200 |
| CD133          | prominin-1,                              | Abcam, ab19898             | Rabbit; Polyclonal                          | 1 to 200 |

| Secondary Antibody     | Fluorochrome      | Manufacturer, catalog #, and/or name of individual providing the antibody | Species raised in; monoclonal or polyclonal | Dilution used |
|------------------------|-------------------|---------------------------------------------------------------------------|---------------------------------------------|---------------|
| Anti- rabbit IgG (H+L) | Alexa Fluor® 448, | Jackson ImmunoResearch; 109010                                            | Donkey; Polyclonal                          | 1 to 500      |
| Anti- mouse IgG (H+L)  | Alexa Fluor® 448  | Jackson ImmunoResearch; 108266                                            | Donkey; Polyclonal                          | 1 to 500      |
| Anti- Rat IgG (H+L)    | Alexa Fluor® 448, | Jackson ImmunoResearch; 109912                                            | Donkey; Polyclonal                          | 1 to 500      |
